# Supplementary material for: A novel high efficiency composite catalyst: single crystal triangular Au nanoplates supported by functional reduced graphene oxide
Source: Royal Society of Chemistry journal article supplement (doi:10.1039/c4cc03306j), 2014-05-22
Supplement: c4cc03306j1.pdf [file c4cc03306j1.pdf]

Electronic Supplementary Material

**A novel high efficiency composite catalyst: single crystal triangle Au nanoplates supported by functional reduced graphene oxide**

Weina Wang,<sup>a</sup> Jiangjiang Gu,<sup>a</sup> Wenwen Hua<sup>b</sup>, Xudong Jia<sup>\*a</sup> and Kai Xi<sup>\*b</sup>

a State Key Laboratory of Coordination Chemistry, Department of Polymer Science & Engineering, Nanjing National Laboratory of Microstructures, Nanjing University, Nanjing 210093, P.R. China. Fax: +86-25-83621337; E-mail: [jiaxd@nju.edu.cn](mailto:jiaxd@nju.edu.cn)

b Department of Polymer Science & Engineering, Nanjing University, Nanjing 210093, P.R. China. Fax: +86-25-83686197; E-mail: [xikai@nju.edu.cn](mailto:xikai@nju.edu.cn)

Format of the video: WMV

Frame size: 640 x 480 pixels

Frame rate: 25 fps

File size: 2.25MB

File name: Reduction of p-nitrophenol using FRGO-Au1 as catalyst

Short descriptive title for the video which can be used when uploading the video onto a streaming channel : The reduction of p-nitrophenol was carried out in a quartz cuvette at room temperature using FRGO-Au1 as catalyst.

A video legend of approx 30 words long: The reduction of p-nitrophenol ( $5 \times 10^{-4}$  M) was carried out in the right cuvette using FRGO-Au1 as catalyst (Au  $2.07 \times 10^{-6}$  M). The solution without catalyst was shown as a comparison in the left cuvette.

5-10 keywords which can be used to tag the video: P-nitrophenol Catalysis Graphene Au Triangular nanoplates
